# Supplementary material for: Extensive and diverse patterns of cell death sculpt neural networks in insects
Source: eLife. 2020 Sep 7;9:e59566. doi: 10.7554/eLife.59566 (PMC7535934; doi:10.7554/eLife.59566)
Supplement: Figure 7—source data 1. [file elife-59566-fig7-data1.xlsx]

## Sheet: Fruit fly
sample id	Octopaminergic cell numbers				T2/T1 ratios
	T1	T2	T3
1	3	6	3		2
2	3	7	3		2.33333
3	3	6	3		2
4	3	7	3		2.33333
5	3	6	3		2
6	3	7	3		2.33333
7	3	7	3		2.33333

## Sheet: Swift lousefly
sample id	Octopaminergic cell numbers				T2/T1 ratios
	T1	T2	T3
1	5	6	5		1.2
2	5	6	5		1.2
3	6	5	damaged		0.833333
