# Supplementary material for: Extensive and diverse patterns of cell death sculpt neural networks in insects
Source: eLife. 2020 Sep 7;9:e59566. doi: 10.7554/eLife.59566 (PMC7535934; doi:10.7554/eLife.59566)
Supplement: Figure 9—source data 1. [file elife-59566-fig9-data1.xlsx]

## Sheet: Fruit fly
	bundle width within 5um of split, at widest point
sample id	T1 - xz		T2 - xz		T3 - xy
	3A	3B	3A	3B	3A	3B
1	3.07	4.66	2.62	3.73	1.52	2.03
2	2.16	2.72	2.41	3.4	1.08	0.98
3	1.41	2.94	1.43	1.82	1.32	0.79
4	1.8	2.41	1.54	3.25	1.08	1.15
5	1.79	2.76	1.84	2.33	0.89	0.67
6	1.86	4.59	1.59	2.57	1.04	0.74
7	1.62	2.67	1.91	3.03	0.89	1.37
sample id	3A/3B ratios
	T1		T2		T3
1	0.658798		0.702413		0.748768
2	0.794118		0.708824		1.10204
3	0.479592		0.785714		1.67089
4	0.746888		0.473846		0.93913
5	0.648551		0.7897		1.32836
6	0.405229		0.618677		1.40541
7	0.606742		0.630363		0.649635

## Sheet: Bee lousefly
	bundle width within 5um of split, at widest point
sample id	T1 - xz		T2 - xz		T3 - xy
	3A	3B	3A	3B	3A	3B
1	1.63	0.67	2.1	0.86	1.3	0.77
2	1.38	0.95	1.89	1.83	1.74	0.86
3	1.24	0.66	1.7	1.28	1.19	0.76
4	1.94	1.1	1.99	1.22	1.17	0.82
5	2.24	1.76	1.89	1.07	2.42	1.33
6	1.95	1.07	1.87	1.01	1.61	0.9
7	2.1	0.94	1.85	1.19	1.57	0.9
8	2.12	1.15	1.5	0.72	1.08	0.66
sample id	3A/3B ratios
	T1		T2		T3
1	2.43284		2.44186		1.68831
2	1.45263		1.03279		2.02326
3	1.87879		1.32812		1.56579
4	1.76364		1.63115		1.42683
5	1.27273		1.76636		1.81955
6	1.82243		1.85149		1.78889
7	2.23404		1.55462		1.74444
8	1.84348		2.08333		1.63636

## Sheet: stats
	Fruit fly	Bee lousefly	test statistic	p value		Observations
N	7	8
T1	0.6±0.1	1.8±0.4	-8.084 (t)	<0.0001	****
T2	0.7±0.1	1.7±0.4	42.22 (F)	0.0001	***	t is F squared
T3	1.1±0.4	1.7±0.2	14.84 (F)	0.0044	*	t is F squared
